# Supplementary material
Source: MDPI journal article supplement (https://www.mdpi.com/2673-4583/10/1/75)
Supplement: s1 [file s1]

Archive with 1 entries (1 files):
- chemproc-1795523-supplementary.pdf
