# Supplementary material
Source: MDPI journal article supplement (https://www.mdpi.com/2673-4583/10/1/75)
Supplement: s1 [file s1 › chemproc-1795523-supplementary.pdf]

# Beneficial microbes application on tomato significantly improves accumulation of metabolites with nutraceutical value

G. Iacomino<sup>1\*</sup>, A. Staropoli<sup>1,2</sup>, M.I. Prigigallo<sup>3</sup>, G. Bubici <sup>3</sup>, M. Scagliola<sup>4</sup>, P. Salerno<sup>4</sup>, S. Bolletti Censi<sup>5</sup>, G. Murolo<sup>5</sup>, F. Vinale<sup>2,6</sup>

<sup>1</sup>Department of Agricultural Sciences, University of Naples Federico II; <sup>2</sup>Institute for Sustainable Plant Protection, National Research Council, SS Portici and <sup>3</sup> SS Bari; <sup>4</sup>Spagro srl; <sup>5</sup>Cosvitec scarl; <sup>6</sup>Department of Veterinary Medicine and Animal Productions, University of Naples Federico II;   
\*e-mail presenting author: giuseppina.iacomino@unina.it

Tomato (*Solanum lycopersicum*) is an important crop and is consumed worldwide. This vegetable is an excellent source of natural compounds (i.e antioxidants including vitamins C and E, lycopene, b-carotene, lutein and flavonoids) and minerals useful for human health.

## AIM OF THE WORK:

Investigate the impact of beneficial microorganisms application on tomato metabolome.

## MATERIALS AND METHODS:

*Streptomyces fulvissimus*, *Bacillus subtilis* and *Trichoderma afroharzianum* were applied on tomato plants in a field trial either as single inoculants or as microbial consortia. After the treatments, plants were harvested and subjected to organic extraction (Figure 1) followed by metabolomic analysis (LC-MS qTOF).

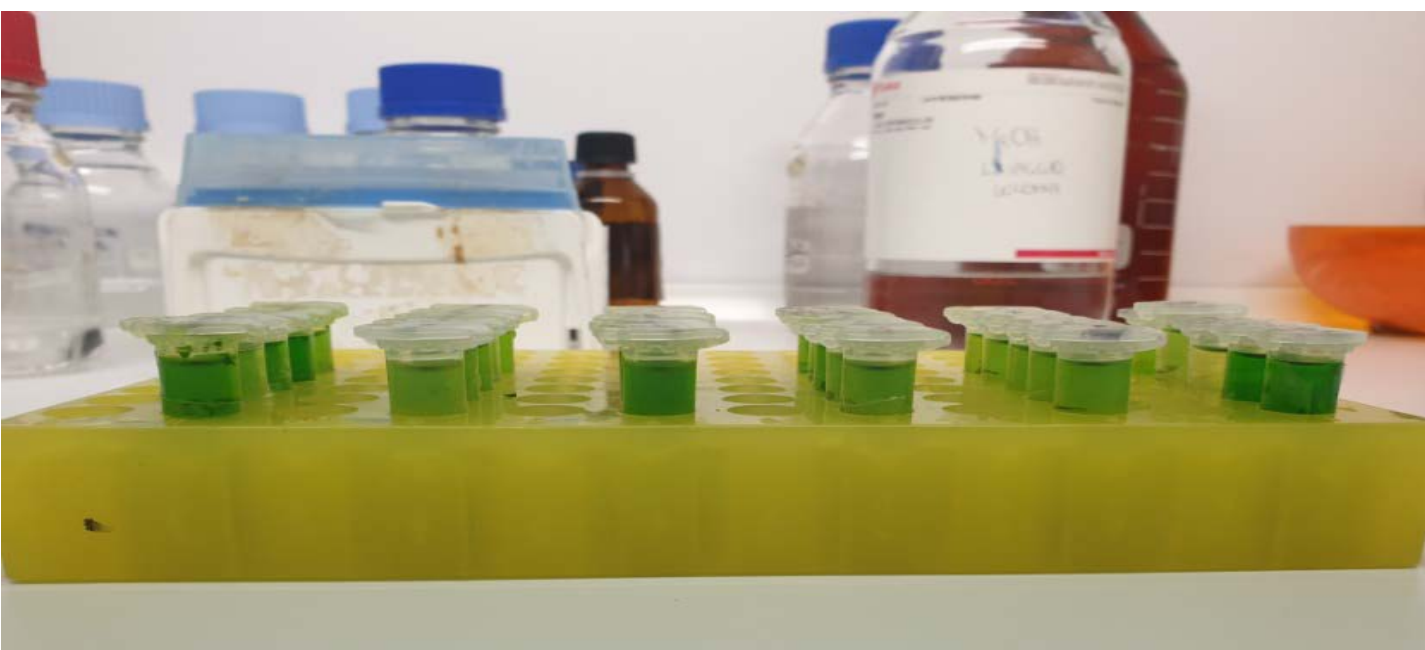

Figure 1. Extraction of metabolites from tomato leaves.

## IDENTIFICATION OF PLANT METABOLITES:

Spectrometric analysis led to the identification of several secondary metabolites (i.e. tomatine, solasodine, etc.) belonging to different classes of natural compounds (Table 1).

## METABOLOMIC ANALYSIS:

Metabolomic analysis highlighted several differentially accumulated compounds, whose abundance is dependent on the treatment (PCA on Figure 2).

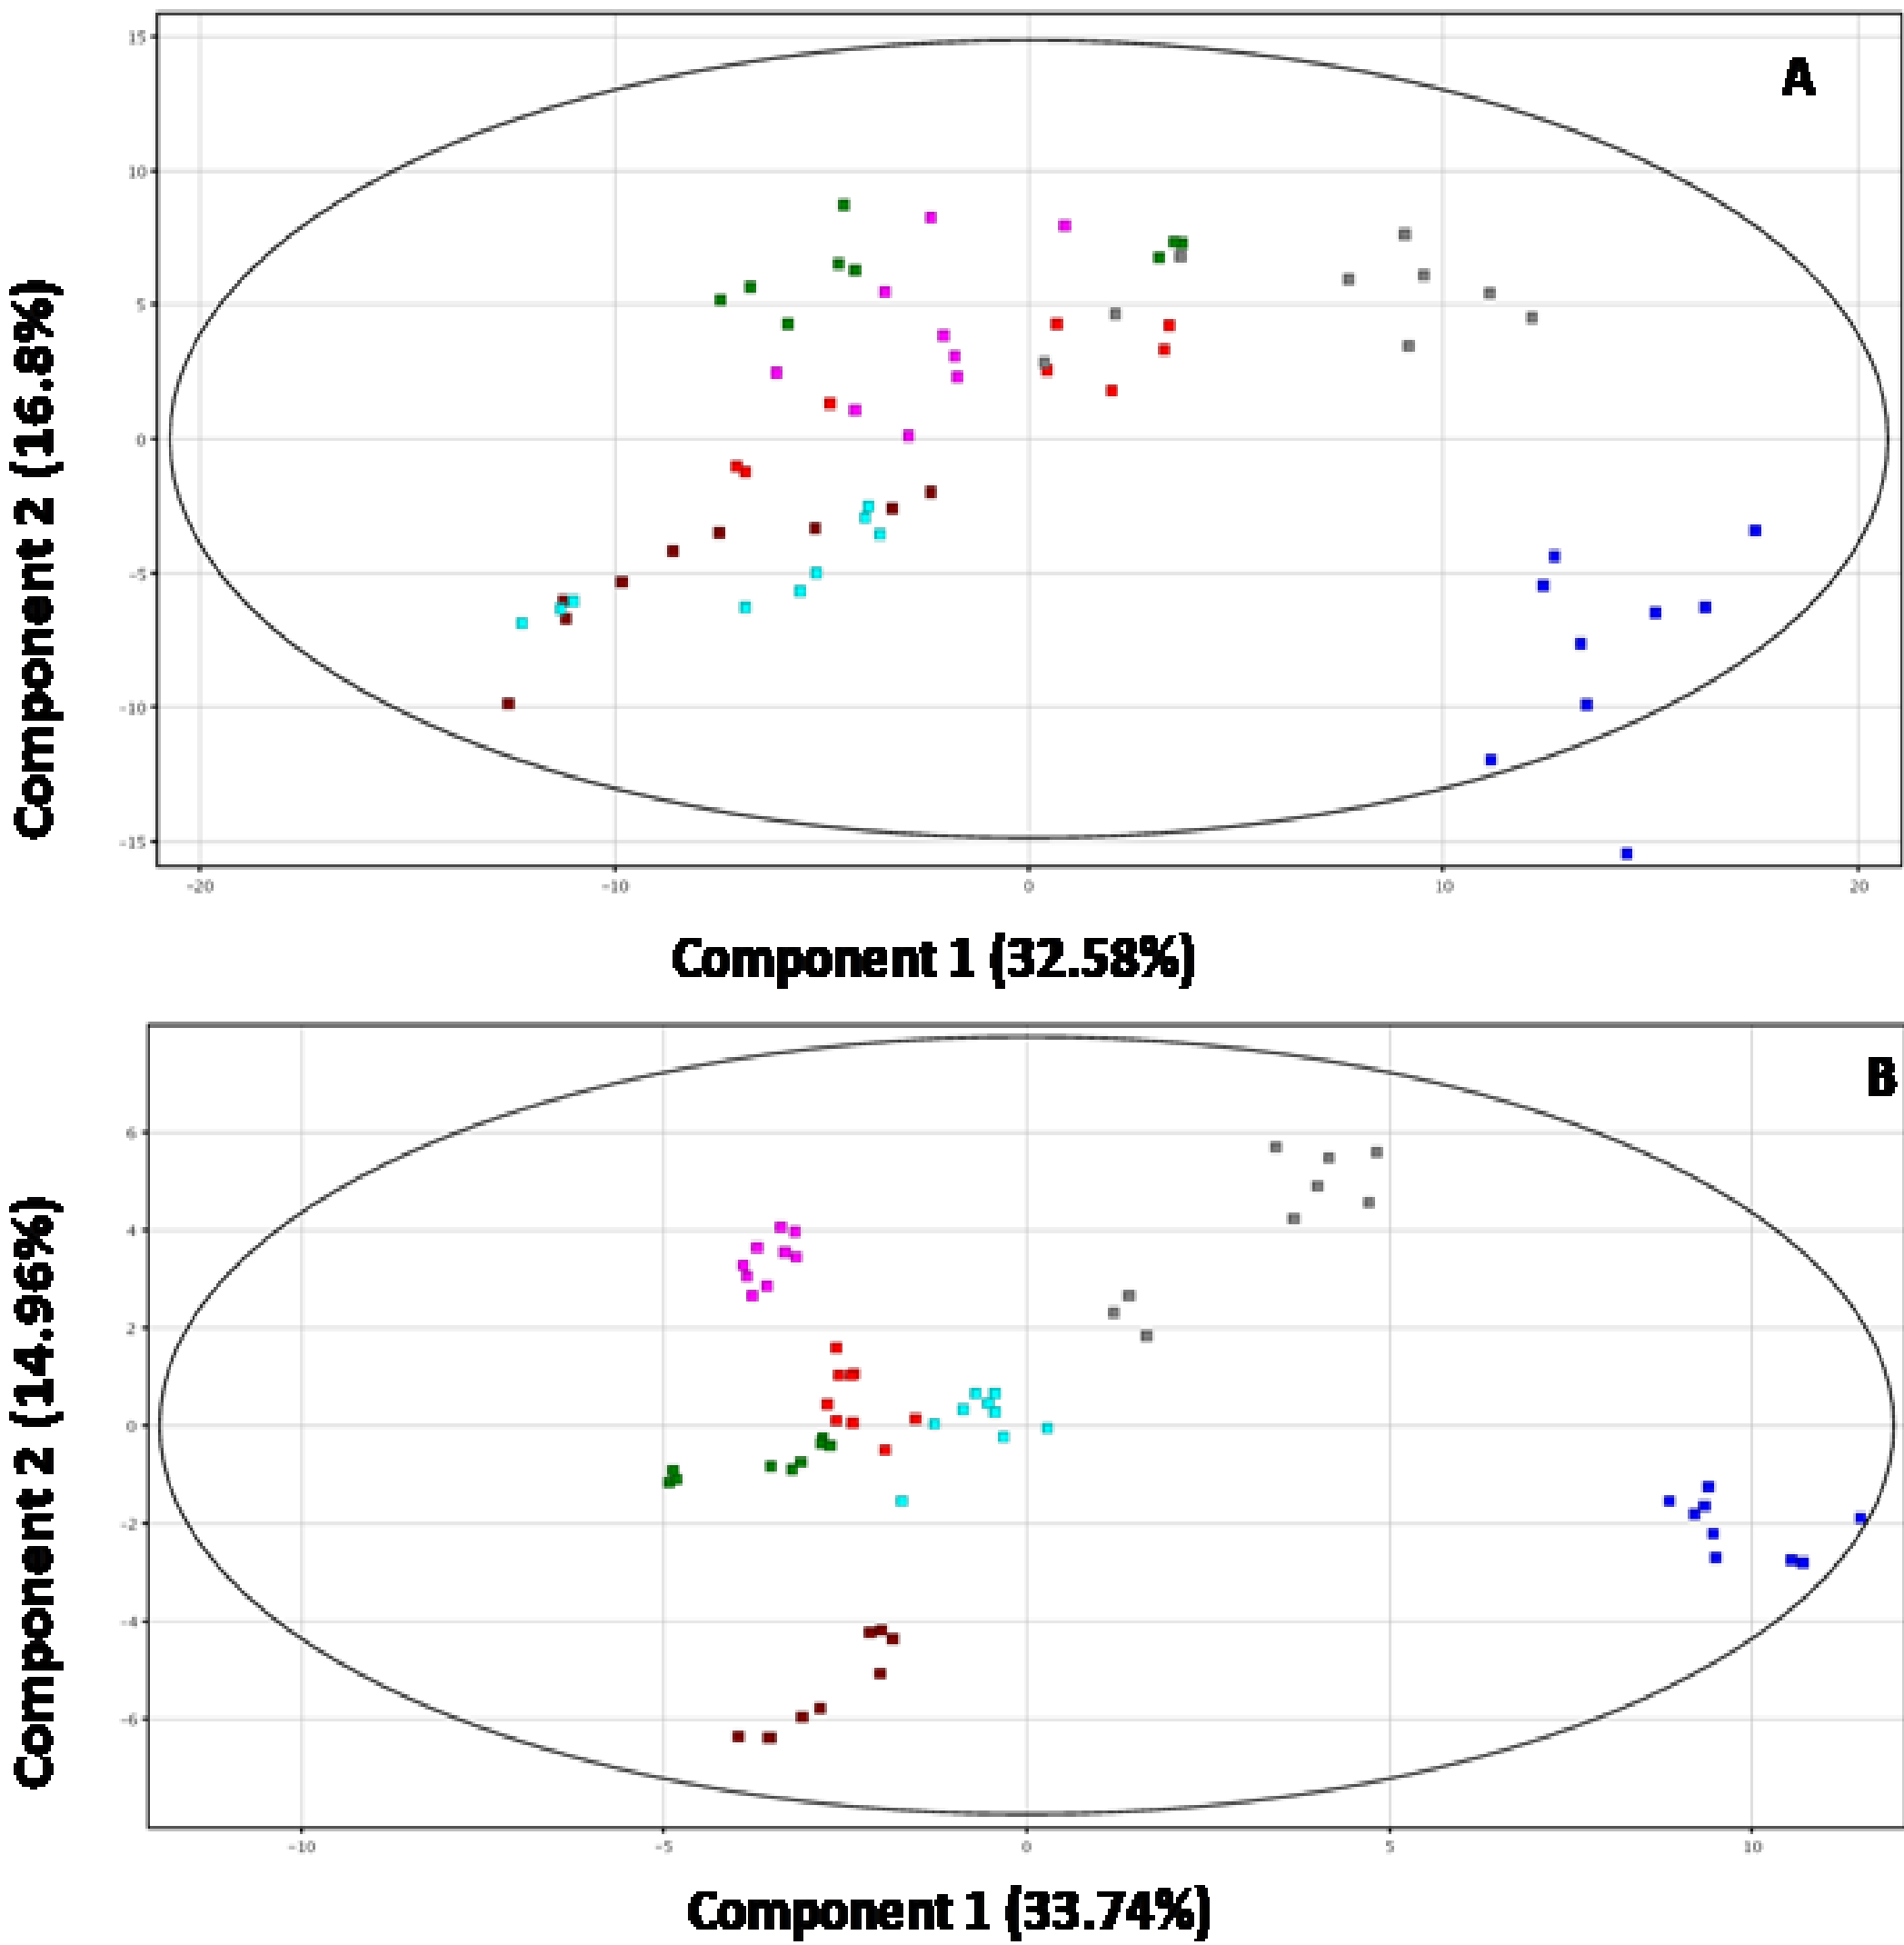

**Figure 2.** Principal components analysis (PCA) score plots of the LC–MS data acquired in positive (B) and negative (A) mode. Each group of replicates subjected to different treatments is depicted with a different color: control group (C) in blu; *Streptomyces fulvissimus* group (S) in brown; *Trichoderma afroharzianum* group (T) in pink; microbial consortium *Streptomyces fulvissimus* and *Bacillus subtilis* group (S+B) in grey; *Bacillus subtilis* group (B) in red; microbial consortium *Streptomyces fulvissimus* and *Trichoderma afroharzianum* group (S+T) in green; microbial consortium *Trichoderma afroharzianum* and *Bacillus subtilis* group (T+B) in light blue.

| Compound                              | RT (min) | Experimental Mass (Da) | Regulation |        |        |          |          |          |
|---------------------------------------|----------|------------------------|------------|--------|--------|----------|----------|----------|
|                                       |          |                        | B vs C     | S vs C | T vs C | B+T vs C | B+S vs C | S+T vs C |
| Tomatine                              | 5.270    | 1033.55                | ↑          | ↓      | ↑      | ↑        | ↑        | ↓        |
| Solafloridine                         | 6.693    | 415.3462               | ↓          | ↓      | ↑      | ↑        | ↑        | ↑        |
| Apo-13-zeaxanthinone                  | 8.855    | 274.1939               | ↓          | ↓      | ↓      | ↓        | ↑        | ↓        |
| Deoxy phytoprostane J1                | 6.813    | 290.1891               | ↓          | ↓      | ↓      | ↓        | ↓        | ↓        |
| Colneleic acid                        | 9.726002 | 294.2206               | ↓          | ↓      | ↓      | ↓        | ↓        | ↓        |
| Solasodine                            | 5.232685 | 413.3294               | ↑          | ↓      | ↑      | ↓        | ↑        | ↓        |
| Isoorientin 2"-O-glucopyranoside      | 5.007    | 610.1537               | ↓          | ↓      | ↓      | ↓        | ↓        | ↓        |
| Quinic acid                           | 1.291    | 192.0632               | ↓          | ↓      | ↓      | ↓        | ↓        | ↓        |
| Quercetin 3-(2G-apiosylrutinoside)    | 4.842    | 742.1949               | ↑          | ↑      | ↑      | ↑        | ↑        | ↑        |
| beta1-Tomatine                        | 5.322    | 901.5028               | ↑          | ↑      | ↑      | ↑        | ↑        | ↑        |
| Kaempferol 3-galactoside-7-rhamnoside | 5.166999 | 594.1582               | ↓          | ↓      | ↓      | ↓        | ↓        | ↓        |

**Table 1.** Putatively identified metabolites differentially accumulated in plants treated with *Streptomyces fulvissimus* (S), *Trichoderma afroharzianum* (T) and *Bacillus subtilis* (B) or as mix (B+S, B+T, S+T) compared to control (group C, untreated plants).  
In black = putatively identified molecule from LC-MS analysis performed in positive mode  
In red = putatively identified molecule from LC-MS analysis performed in negative mode  
↑ Up-regulated vs control (C). ↓ Down-regulated vs control (C).

## Conclusion:

Field applications of *Streptomyces fulvissimus*, *Bacillus subtilis* and *Trichoderma afroharzianum* induced changes in the metabolic profile of tomato. In particular, a certain accumulation of molecules has been observed, such as tomatin, with demonstrated antioxidant, antitumoral and fungicidal properties. The accumulation of these metabolites with nutraceutical value represents a starting point for further future studies to investigate the efficacy of these beneficial strains.
